# Supplementary material
Source: publisher figshare collection journal article supplement (https://rs.figshare.com/ndownloader/files/36169942)

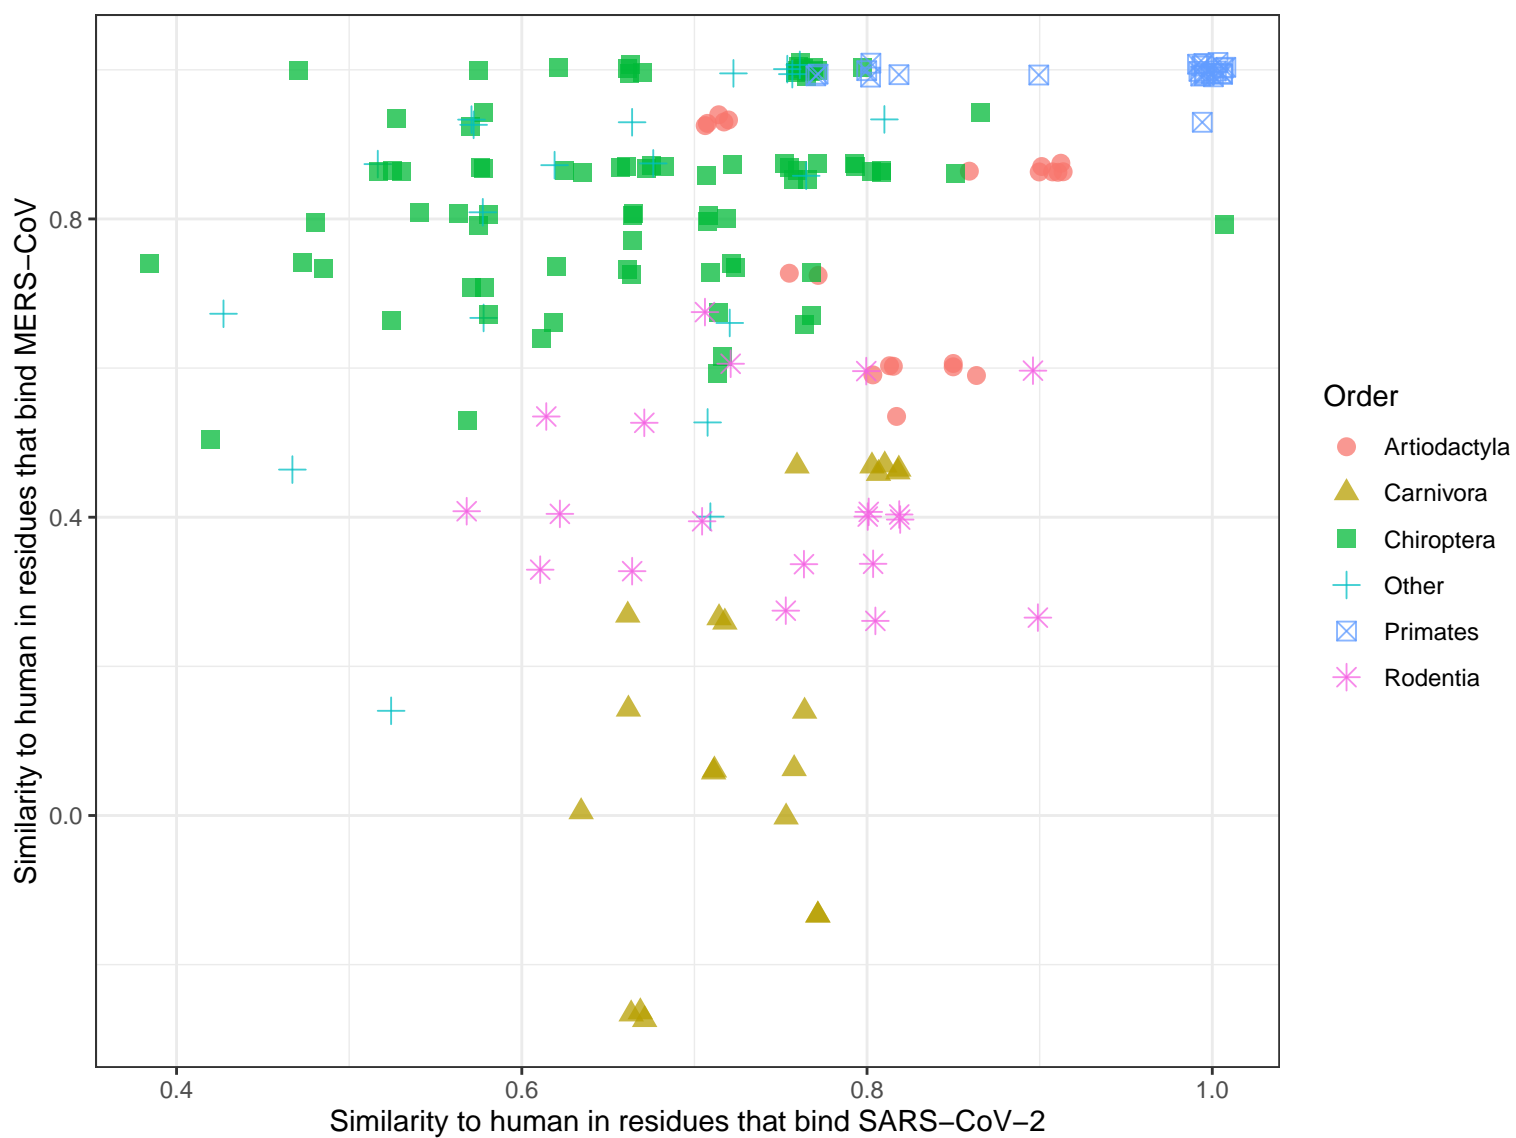

Supplement: Supplementary file 2 [file 36169942]

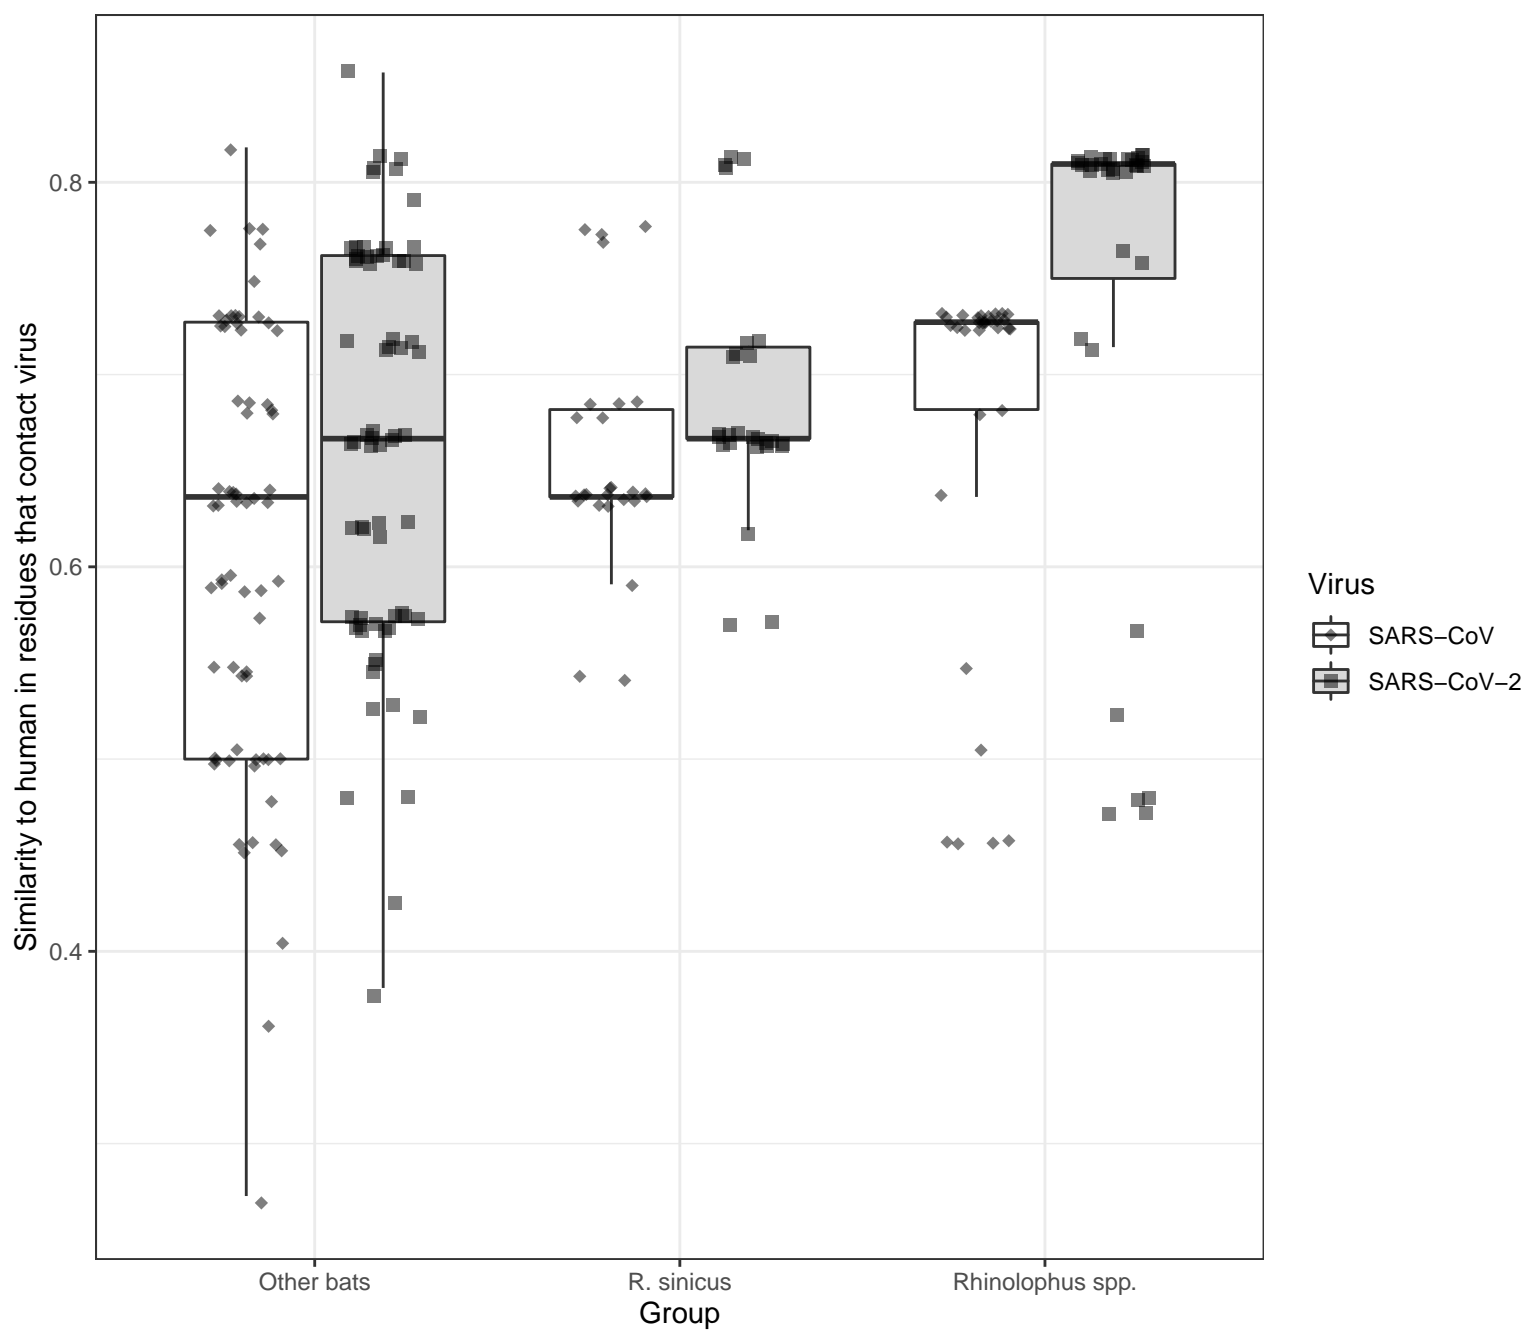

Supplement: Supplementary file 3 [file 36169942]
